# Supplementary material for: Personality and psychopathological characteristics in functional movement disorders
Source: PLoS One. 2024 May 10;19(5):e0303379. doi: 10.1371/journal.pone.0303379 (PMC11086865; doi:10.1371/journal.pone.0303379)
Supplement: S1 Dataset — (XLSX) [file pone.0303379.s003.xlsx]

## Sheet: Foglio1
Patient number	CASE=0; Control=1	tremor=0; gait=1	SEX M=0 F=1	AGE	Education	MMSE	MOCA	FAB	Rey-immediato	Rey-diff	Riconoscimento corretti	Riconoscimento falsi	Stroop tempo	Stroop errori	FAS	Clock	Hamilton-D	STAI 1	STAI 2	TAS-20	SCID	R>17	L>0.99=1; L<0.3 2	DEPI>5	CDI>3	HVI	OBS	ADj.D≤1	EB PER	EB intr=0, extr=1, ambi=2	FM+m<2=1; >5=2	Zd<-3=1; >+3=2	XA%=0.80, 1; <.07=2	WDA<0.70	X-%>0,25	P<4=1; P>6=2	FC<=CF+C	SumY>2	SumT>1	SumV>0	SumC'>2	SumC'>WSumC	Fr+Rf>0	An+Xy>1	SumH<3=1; >5=2	GHR<PHR
1	0		1	43	13	27.9	25	16.9	30.8	7.1	14	1	26.75	1.75	45.5	0	6	37	37	35		1		1	0	0	0	0	0	1	0	0	2	0	1	0	1	0	0	1	0	0	1	1	0	0
2	0		1	44	13	29	27	15.9	44.8	8.1	14	2	21.25	0	34.5	0	7	41	40	40	1	1		0	1	0	0	0	0	2	1	0	0	0	0	0	1	0	0	0	0	0	0	1	0	0
3	0		0	24	13	27.6	27	14.5	36.1	5.5	15	0	38.25	2.5	18.2	0	6	46	50	44		1		0	0	0	0	0	0	0	0	1	0	0	0	0	0	0	0	1	0	1	1	1	0	0
4	0		1	41	13	28.9	26	15.9	35.8	7.1	15	0	23.25	1.25	31.5	0	3	31	34	35		1		1	0	0	0	1	0	2	0	1	0	0	0	2	1	0	0	1	0	0	0	0	0	0
5	0		0	31	13	28.7	24	16.7	45.3	8.2	15	1	27	0	46.8	0	7	48	32	43	1	1		0	0	0	0	0	0	0	0	0	2	0	0	1	1	1	0	0	0	0	0	1	0	1
6	0		0	30	8	29.4	27	16.5	45.1	7.9	14	0	22.25	0	34	1	3	40	34	41		1	0	0	0	1	0	0	0	0	1	1	0	0	1	0	0	0	0	0	1	1	0	1	0	0
7	0		0	21	13	27.6	26	14.5	40.1	5.5	15	0	27.75	0	41.2	0	5	28	37	44	1	1	0	0	0	1	0	1	0	0	2	1	2	0	1	0	0	1	0	0	0	0	1	1	0	1
8	0		0	31	13	28.7	26	16.7	47.3	7.2	15	0	27	0	47.8	0	9	49	43	25	1	1	0	0	1	0	0	1	0	0	2	1	0	0	1	1	1	1	1	0	0	0	1	1	2	0
9	0		1	19	8	29.2	27	15.3	33.9	6.2	14	0	23	0	18.4	2	2	39	34	36	1	1	1	0	0	0	0	0	0	1	0	1	2	0	1	0	0	0	0	0	0	0	0	1	2	1
10	0		0	56	8	30	27	16.1	49.7	10.6	14	0	7.5	0	30	2	14	57	51	41	1	1	1	0	1	0	0	1	0	2	0	1	0	0	0	1	0	0	0	0	0	1	0	0	0	0
11	0		1	68	18	27.5	22	17.3	27.5	4.1	10	0	41.75	0.75	21.8	0	14	46	50	41	1	1	1	1	1	0	0	1	0	2	1	1	0	0	0	0	1	0	1	1	0	1	0	1	1	0
12	0		0	26	18	28	28	15	36.4	8.4	14	0	19.5	0	29.3	0	4	72	49	30	1	1	1	0	0	0	0	0	0	2	0	1	0	0	0	0	1	0	0	0	0	0	0	0	0	0
13	0		0	19	13	28.5	21	14.5	33.1	5.5	13	1	25.75	0	27.2	4	15	43	53	41	1	1	0	0	0	0	0	0	0	2	2	1	2	0	1	0	1	1	0	0	0	1	0	0	0	1
14	0		0	58	13	28.9	25	14.3	36	6.5	14	2	46.25	2	46.8	0	11	36	44	55	1	1	0	0	0	0	0	0	0	2	0	1	0	0	0	0	0	0	0	0	1	1	0	0	0	0
15	0		0	56	13	29	27	15.3	46	9.5	15	2	21.25	0	32.8	0	5	24	28	36		1	0	0	0	0	0	1	0	0	2	1	0	0	0	0	1	0	0	0	0	0	0	1	0	1
16	0		1	24	8	27.1	27	15.5	45.1	9.5	15	0	26.75	0	21.2	0	1	34	32	36	1	1	0	0	0	0	0	0	0	2	1	0	0	0	0	0	0	0	0	0	0	0	1	1	0	0
17	0		1	27	8	27.2	26	15.3	30.9	5.5	14	0	21.5	0	27.7	1	6	43	37	51	1	0	0	0	1	0	0	0	0	2	1	1	0	0	0	1	1	0	1	0	0	0	0	0	1	0
18	0		1	41	13	28.6	21	16.7	35.5	5.7	12	0	18.25	1.25	32.7	4	2	42	32	33		0	2	0	1	0	0	0	0	2	0	0	2	0	1	1	1	0	0	0	0	0	0	0	1	1
19	0		0	20	13	28.5	27	16.5	36.1	8.5	15	0	21.25	0	50.2	0	12	51	66	30	1	1	0	1	0	0	0	0	0	0	0	1	1	0	0	0	0	1	0	1	0	0	0	1	0	0
20	0		0	63	13	24.5	24	17.5	32.3	5.7	12	0	18.75	0.25	41.5	0	9	23	20	36	1	1	1	0	1	0	0	0	0	0	1	0	2	0	0	1	1	1	0	0	0	0	0	0	1	0
21	0		0	59	8	29	27	18	38.7	9.2	14	0	41	0.5	38	1	11	51	40	43		1	2	0	1	0	0	1	0	1	0	0	0	0	0	1	1	1	0	0	0	0	0	0	1	0
22	0		0	22	13	27.6	26	15.5	53.1	10.5	15	0	36.25	0	36.2	0	8	42	37	34	1	1	0	0	0	0	0	0	0	2	2	1	0	0	0	2	0	0	0	1	0	0	0	1	0	0
23	0		0	17	8	29.2	26	15.3	43.9	6.2	15	0	21.5	0	41.2	1	11	50	58	43	1	1	1	0	1	0	0	1	0	2	0	1	2	0	1	1	0	0	0	0	0	1	0	1	0	1
24	0		0	21	13	28.1	29	15	43.3	9.1	14	0	26	0	5	0	8	36	37	51	1	1	1	0	0	0	0	0	0	0	0	1	0	0	0	0	0	0	0	0	0	0	0	0	0	0
25	1	1	0	60	13	28.4	26	17.5	36.6	5	11	1	26.5	0	21.3	0	12	45	42	35	1	1	0	0	0	0	0	0	0	2	1	1	0	0	0	2	1	0	0	1	0	0	1	1	0	0
26	1	1	0	71	5	29.3	24	13.3	47	8.4	12	0	46.75	0	31.6	4	12	39	49	58		0	1	0	1	0	0	0	0	1	0	1	0	0	0	1	1	0	0	0	0	0	0	0	1	1
27	1	0	0	57	13	28	26	17.2	28.5	5.5	15	0	27.7	0	56.3	0	1	64	57	61	1	1	0	0	0	0	0	0	0	2	1	1	0	0	0	2	1	0	0	1	0	0	1	1	0	0
28	1	1	0	58	8	27.4	25	15.6	38.8	8	14	0	25.9	0.7	30.1	0	7	30	39	64	1	1	1	0	0	0	0	1	0	0	0	1	0	0	0	2	0	0	0	1	0	1	0	0	0	0
29	1	0	0	42	13	28.8	25	16.9	43.8	9.1	15	0	32.75	0	29.5	0	5	32	35	25	1	1	1	0	0	0	0	0	0	0	0	1	2	0	1	0	0	0	0	0	0	0	0	1	0	0
30	1	0	0	17	11	28.6	28	16.3	38.9	6.2	14	1	24	0	30.4	0	9	67	59	47		1	0	0	1	0	0	0	0	1	2	1	0	0	0	0	1	1	1	0	0	0	0	0	0	0
31	1	0	0	35	8	29.4	25	15.5	34.2	8.3	13	0	20.5	1.5	25.3	1	12	48	42	44	1	1	1	0	1	0	0	0	0	0	0	1	0	0	1	2	0	0	0	0	0	1	1	0	2	0
32	1	0	0	17	5	20.8	17	9.8	21.9	2.7	13	1	47.5	5.25	20.1	5	8	52	58	69	1	1	1	0	0	0	0	0	0	1	1	1	0	0	0	0	0	0	0	0	0	0	0	1	0	0
33	1	1	0	16	8	27.2	22	15.3	37.9	8.2	14	0	29.5	2	40.4	2	8	41	35	43		1	1	0	0	0	0	0	0	0	1	1	0	0	0	2	0	0	0	0	0	0	0	0	2	0
34	1	1	1	59	13	18.9	16	14.3	31	8.5	14	0	44.75	0	26.8	4	15	43	50	65		1	0	1	1	0	0	1	0	1	0	0	0	0	0	2	1	0	0	1	1	0	0	1	2	0
35	1	1	0	50	13	29	22	15.2	33.5	6	12	1	24.25	0.75	27.3	1	22	63	30	65	1	1	1	0	1	0	0	0	0	0	0	1	0	0	1	2	0	0	0	0	0	1	0	0	1	0
36	1	1	0	38	13	28.7	28	16.7	42.5	10.6	15	0	24.25	0	33.1	1	8	32	23	39		0	1	0	0	0	0	0	0	2	1	1	0	0	0	0	0	0	0	0	0	1	0	0	2	0
37	1	1	0	19	13	27.5	29	16.5	41.1	7.5	15	0	22.75	0	27.2	0	8	36	38	40	1	1	1	0	1	0	0	1	0	2	2	1	2	0	1	0	0	0	0	1	0	0	1	1	0	0
38	1	0	0	52	8	28	26	15.9	33.2	5.6	10	0	31	0	25.5	0	6	43	36	44		1	1	0	0	0	0	1	0	0	1	1	1	0	0	2	0	1	0	1	0	1	1	0	1	0
39	1	1	0	44	18	26.2	25	16.4	44	10.6	15	0	25.5	2.25	25.3	1	4	28	31	51		1	0	0	0	0	0	1	0	2	0	1	0	0	1	0	0	0	1	1	0	0	0	0	0	0
40	1	1	0	59	13	29	26	16.3	48	10.5	15	1	12.25	0	45.8	1	13	27	35	45	1	1	0	1	1	0	0	1	0	2	0	1	2	0	1	0	1	0	0	1	1	1	0	1	2	1
41	1	1	0	36	13	26.8	25	14.7	36.5	7.6	15	1	29.75	3.25	12.1	1	10	34	36	35		1	1	0	0	0	0	0	0	1	1	1	0	0	0	0	1	0	0	0	0	0	0	1	2	0
42	1	1	0	32	8	28.4	25	16.5	40.1	7.9	15	0	27.25	0	29	0	6	38	41	30		1	2	0	0	0	0	1	0	1	0	1	0	0	0	1	0	1	0	0	1	0	1	0	1	0
43	1	0	0	46	16	27.2	22	16.9	52.1	10.5	15	0	13.5	0	49.9	0	2	29	27	64		1	1	0	0	1	0	1	0	2	0	1	2	0	1	0	0	1	0	1	0	0	0	1	2	0
44	1	1	0	46	13	28.9	26	15.9	46.1	7.5	15	0	26	0	25.9	0	4	42	37	44		1	0	0	1	0	0	0	0	0	0	1	0	0	0	2	0	1	0	0	0	0	0	1	2	0
45	1	0	1	34	13	24.75	23	13.7	38.3	7.2	14	1	29	2.5	30.8	3	7	72	55	73	1	1	1	0	0	0	0	1	0	0	0	1	0	0	0	0	1	1	0	0	0	1	0	1	2	0
46	1	1	1	20	13	27.5	28	13.5	30.1	5.5	14	0	32.25	0	15.2	0	12	28	27	62	1	1	1	0	1	0	0	0	0	2	1	0	0	0	1	0	0	0	1	0	0	0	1	0	0	1
47	1	1	0	30	13	27.8	22	13.7	39.3	8.2	13	0	21	0	38.8	0	4	28	28	43		1	2	1	1	0	0	0	0	2	1	1	2	0	1	0	1	1	0	1	0	0	1	1	1	0
48	1	1	0	45	18	27.2	26	16.4	31.3	6.1	13	0	18.75	0	24.3	0	1	31	30	40		1	1	0	0	0	0	0	0	0	1	1	0	0	0	2	1	0	0	0	0	0	0	1	2	0
49	1	1	0	35	13	27.8	24	15.7	29.5	7.6	14	0	25.75	0	22.1	0	9	55	37	40		1	1	0	1	0	0	0	0	2	1	0	2	0	1	0	1	0	0	0	0	0	0	1	1	0
50	1	1	0	51	13	28	27	17.2	52.5	12	15	0	10.25	0	31.3	0	8	43	60	51	1	1	0	1	0	0	0	1	0	0	1	1	0	0	0	0	0	0	0	1	1	1	0	0	2	0
51	1	1	0	21	13	28.6	28	16.5	42.1	7.5	15	0	26.75	0	45.2	0	2	27	26	34		1	1	1	1	0	0	1	0	2	0	1	0	0	0	1	0	0	0	1	1	1	1	1	2	0
52	1	1	1	62	8	28.5	25	16.3	33.3	5.7	13	2	29.25	0.25	28.5	2	9	34	32	37		0	1	0	0	0	0	0	0	0	0	0	0	0	0	0	1	0	0	0	0	1	0	0	0	0
53	1	1	0	37	13	28.8	27	15.7	42.5	10.6	15	0	24.25	0	33.1	0	5	40	30	45		1	0	0	1	0	0	1	0	1	0	1	0	0	0	0	0	0	0	1	1	1	0	0	1	0
54	1	1	0	40	13	28.2	28	16.9	47.8	9.1	15	0	21.25	0	37.5	1	7	33	36	30		1	1	0	0	0	0	0	0	2	1	0	0	0	0	0	1	0	0	0	1	1	1	1	0	0
55	1	1	0	19	8	29.2	26	16.3	36.9	9.2	15	0	26.5	0	34.4	0	4	51	52	58	1	1	1	0	0	0	0	0	0	2	0	1	2	0	1	0	0	0	0	0	0	0	1	1	2	1
